# Supplementary material
Source: Royal Society of Chemistry journal article supplement (doi:10.1039/d6nj00699j)
Supplement: d6nj00699j1.pdf [file d6nj00699j1.pdf]

## Supplementary Materials

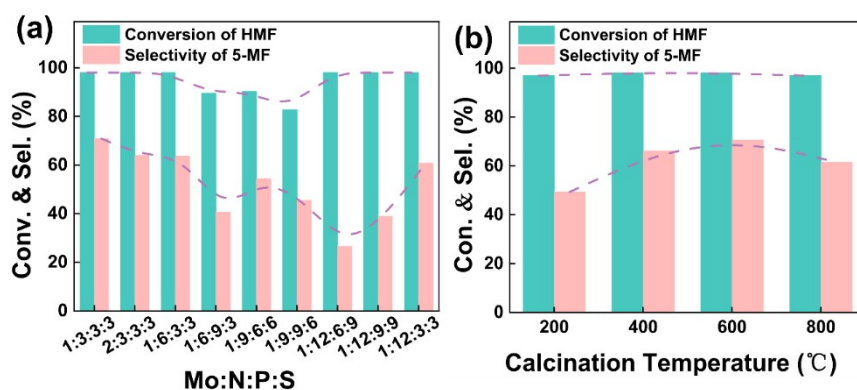

Figure S1. Catalytic performance of (a) influence of N, P, S ratio; (b) influence of calcination temperature.

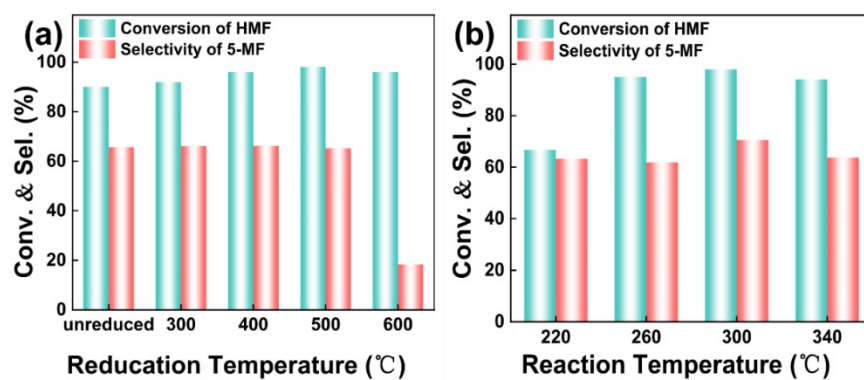

Figure S2. Catalytic performance of (a) influence of reduction temperature; (b) influence of reaction temperature.

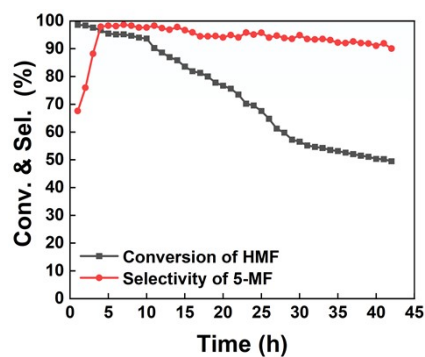

Figure S3. Real-time data of Mo-NPS catalyst in HMF hydrogenolysis.

**Table S1 ICP-MS qualitative results of the reaction solution after Mo-NPS catalytic reaction**

| Analytes | Detection Status | Concentration (ppm) |
|----------|------------------|---------------------|
| Mo       | Detected         | 0.0386              |
| P        | Detected         | 0.1575              |
| N        | Not Detected     | —                   |
| S        | Not Detected     | —                   |

**Table S2 Catalytic performance for different reactants**

| Catalyst | Reactant | C (%) | S <sub>2,5-DMF</sub> (%) | S <sub>5-MF</sub> (%) | S <sub>DFP</sub> (%) | S <sub>others</sub> (%) |
|----------|----------|-------|--------------------------|-----------------------|----------------------|-------------------------|
| Mo-NPS   | HMF      | 90.7  | 0                        | 97.6                  | 0                    | 2.4                     |
| Mo-NPS   | 5-MF     | 3.6   | 32.7                     | —                     | 15.1                 | 52.2                    |
| Mo-NPS   | DFP      | 87.6  | 0                        | 47.4                  | —                    | 52.6                    |

**Table S3. XPS element content of fresh catalyst NPS-Mo**

| catalyst     | Elemental composition(%) |       |       |      |       |       | Mo-composition(%) |                  |                  |                  |
|--------------|--------------------------|-------|-------|------|-------|-------|-------------------|------------------|------------------|------------------|
|              | Mo                       | N     | P     | S    | O     | C     | Mo <sup>2+</sup>  | Mo <sup>3+</sup> | Mo <sup>4+</sup> | Mo <sup>6+</sup> |
| Mo-DCD-dppb  | 2.51                     | 8.52  | 6.97  | 1.31 | 26.07 | 54.62 | 0                 | 22.47            | 60.28            | 17.25            |
| AMT-DCD-dppb | 2.74                     | 9.39  | 6.36  | 3.56 | 20.87 | 57.08 | 13.43             | 32.58            | 0                | 53.99            |
| Mo-urea-dppb | 1.96                     | 6.07  | 5.55  | 2.67 | 19.17 | 64.58 | 5.84              | 35.49            | 0                | 58.67            |
| Mo-phen-dppb | 2.43                     | 9.91  | 9.02  | 1.39 | 38.12 | 39.13 | 0                 | 18.4             | 0                | 81.6             |
| Mo-urea-dppe | 2.56                     | 8.59  | 9.38  | 3.13 | 37.17 | 39.17 | 0                 | 34.82            | 0                | 65.18            |
| Mo-ADP       | 3.4                      | 11.89 | 14.76 | 1.31 | 57.66 | 10.98 | 0                 | 19.66            | 0                | 80.34            |

**Table S4. XPS element content of NPS-Mo catalyst after reaction**

| Catalyst     | Elemental composition(%) |       |       |      |       |       | Mo-composition(%) |                  |                  |
|--------------|--------------------------|-------|-------|------|-------|-------|-------------------|------------------|------------------|
|              | Mo                       | N     | P     | S    | O     | C     | Mo <sup>3+</sup>  | Mo <sup>4+</sup> | Mo <sup>6+</sup> |
| Mo-DCD-dppb  | 3.11                     | 11.67 | 8.57  | 0.98 | 34.34 | 41.33 | 25.46             | 0                | 74.54            |
| AMT-DCD-dppb | 2.62                     | 10.03 | 6.02  | 2.35 | 28.79 | 50.19 | 25.34             | 0                | 74.66            |
| Mo-urea-dppb | 3.58                     | 12.47 | 7.29  | 2.76 | 32.03 | 41.87 | 24.2              | 0                | 75.8             |
| Mo-phen-dppb | 3.13                     | 11.4  | 10.84 | 1.82 | 45.22 | 27.56 | 28.29             | 0                | 71.71            |
| Mo-urea-dppe | 2.72                     | 9.07  | 12.63 | 1.84 | 52.01 | 21.73 | 26.61             | 0                | 73.39            |
| Mo-ADP       | 3.87                     | 13    | 10.81 | 3.23 | 42.65 | 26.44 | 30.75             | 31.87            | 37.38            |

**Table S5. The adsorption energy of H<sub>2</sub> and HMF on catalysts with different coordinates**

| Entry | Catalyst                                                       | H <sub>2</sub> (eV) | HMF(eV)  |
|-------|----------------------------------------------------------------|---------------------|----------|
| 1     | Mo-N <sub>4</sub> P <sub>0</sub> S <sub>0</sub> C <sub>0</sub> | -1.02185            | -0.57632 |
| 2     | Mo-N <sub>0</sub> P <sub>4</sub> S <sub>0</sub> C <sub>0</sub> | -0.64324            | -0.302   |
| 3     | Mo-N <sub>0</sub> P <sub>0</sub> S <sub>4</sub> C <sub>0</sub> | -1.01369            | -0.43467 |
| 4     | Mo-N <sub>0</sub> P <sub>0</sub> S <sub>0</sub> C <sub>4</sub> | -0.34978            | -0.78841 |
| 5     | Mo-N <sub>1</sub> P <sub>3</sub> S <sub>0</sub> C <sub>0</sub> | -1.07192            | -0.88183 |
| 6     | Mo-N <sub>2</sub> P <sub>2</sub> S <sub>0</sub> C <sub>0</sub> | -0.88439            | -0.46156 |
| 7     | Mo-N <sub>3</sub> P <sub>1</sub> S <sub>0</sub> C <sub>0</sub> | -0.69601            | -0.27962 |
| 8     | Mo-N <sub>1</sub> P <sub>0</sub> S <sub>3</sub> C <sub>0</sub> | -1.5644             | -1.5644  |
| 9     | Mo-N <sub>2</sub> P <sub>0</sub> S <sub>2</sub> C <sub>0</sub> | -0.89143            | -1.34542 |
| 10    | Mo-N <sub>3</sub> P <sub>0</sub> S <sub>1</sub> C <sub>0</sub> | -1.12922            | -1.88287 |
| 11    | Mo-N <sub>1</sub> P <sub>0</sub> S <sub>0</sub> C <sub>3</sub> | -0.41496            | -0.73467 |

**Table S5(Continued)**

|    |                                                                |          |          |
|----|----------------------------------------------------------------|----------|----------|
| 12 | Mo-N <sub>2</sub> P <sub>0</sub> S <sub>0</sub> C <sub>2</sub> | -0.6773  | -0.94059 |
| 13 | Mo-N <sub>3</sub> P <sub>0</sub> S <sub>0</sub> C <sub>1</sub> | -0.68863 | -0.75841 |
| 14 | Mo-N <sub>0</sub> P <sub>1</sub> S <sub>3</sub> C <sub>0</sub> | -0.66193 | -0.46228 |
| 15 | Mo-N <sub>0</sub> P <sub>2</sub> S <sub>2</sub> C <sub>0</sub> | -0.78787 | -0.77877 |
| 16 | Mo-N <sub>0</sub> P <sub>3</sub> S <sub>1</sub> C <sub>0</sub> | -0.72607 | -0.66981 |
| 17 | Mo-N <sub>0</sub> P <sub>1</sub> S <sub>0</sub> C <sub>3</sub> | -0.52423 | -0.63719 |
| 18 | Mo-N <sub>0</sub> P <sub>2</sub> S <sub>0</sub> C <sub>2</sub> | -0.83865 | -0.67092 |
| 19 | Mo-N <sub>0</sub> P <sub>3</sub> S <sub>0</sub> C <sub>1</sub> | -0.62876 | -0.72559 |
| 20 | Mo-N <sub>0</sub> P <sub>0</sub> S <sub>1</sub> C <sub>3</sub> | -0.56666 | -0.68442 |
| 21 | Mo-N <sub>0</sub> P <sub>0</sub> S <sub>2</sub> C <sub>2</sub> | -0.70299 | -0.57497 |
| 22 | Mo-N <sub>0</sub> P <sub>0</sub> S <sub>3</sub> C <sub>1</sub> | -0.59305 | -0.32371 |
| 23 | Mo-N <sub>1</sub> P <sub>1</sub> S <sub>2</sub> C <sub>0</sub> | -1.66589 | -0.7722  |
| 24 | Mo-N <sub>1</sub> P <sub>2</sub> S <sub>1</sub> C <sub>0</sub> | -0.98297 | -0.86705 |
| 25 | Mo-N <sub>2</sub> P <sub>1</sub> S <sub>1</sub> C <sub>0</sub> | -1.03528 | -1.443   |
| 26 | Mo-N <sub>1</sub> P <sub>1</sub> S <sub>0</sub> C <sub>2</sub> | -1.11751 | -0.77709 |
| 27 | Mo-N <sub>1</sub> P <sub>2</sub> S <sub>0</sub> C <sub>1</sub> | -0.6243  | -0.56816 |
| 28 | Mo-N <sub>2</sub> P <sub>1</sub> S <sub>0</sub> C <sub>1</sub> | -0.71567 | -0.62613 |
| 29 | Mo-N <sub>1</sub> P <sub>0</sub> S <sub>1</sub> C <sub>2</sub> | -0.62955 | -0.53331 |
| 30 | Mo-N <sub>1</sub> P <sub>0</sub> S <sub>2</sub> C <sub>1</sub> | -0.41294 | -1.27799 |
| 31 | Mo-N <sub>2</sub> P <sub>0</sub> S <sub>1</sub> C <sub>1</sub> | -0.83494 | -0.54133 |
| 32 | Mo-N <sub>0</sub> P <sub>1</sub> S <sub>1</sub> C <sub>2</sub> | -0.58995 | -0.50518 |
| 33 | Mo-N <sub>0</sub> P <sub>1</sub> S <sub>2</sub> C <sub>1</sub> | -0.44977 | -0.36353 |

**Table S5(Continued)**

---

|    |                                                                |          |          |
|----|----------------------------------------------------------------|----------|----------|
| 34 | Mo-N <sub>0</sub> P <sub>2</sub> S <sub>1</sub> C <sub>1</sub> | -0.8154  | -0.45696 |
| 35 | Mo-N <sub>1</sub> P <sub>1</sub> S <sub>1</sub> C <sub>1</sub> | -0.87586 | -1.41169 |

---

**Table S6. Summary of noble metal catalysts reported for 5-HMF to 5-MF**

| Entry | Catalyst                               | Catalyst (mg) | HMF (mmol) | T(°C) | t (h) | H <sub>2</sub> Pressure (MPa) | Solvent                       | Conv. (%) | S <sub>5-MF</sub> (%) | STY (mg·g <sup>-1</sup> <sub>cat</sub> ·h <sup>-1</sup> ) | Ref       |
|-------|----------------------------------------|---------------|------------|-------|-------|-------------------------------|-------------------------------|-----------|-----------------------|-----------------------------------------------------------|-----------|
| 1     | Pt@PVP/Nb <sub>2</sub> O <sub>5</sub>  | 40            | 0.3        | 140   | 24    | 4                             | THF                           | 100       | 92                    | 31.7                                                      | 1         |
| 2     | Au@NPC                                 | 400           | 1          | 180   | 1.5   | 0.1                           | 1,4-dioxane                   | 100       | 95                    | 174.3                                                     | 2         |
| 3     | Ru/TiO <sub>2</sub>                    | 500           | 23.8       | 220   | 3     | 7                             | THF                           | 99        | 10.3                  | 178.2                                                     | 3         |
| 4     | FPhS-Pd/C                              | 50            | 2          | 100   | 6     | 4                             | H <sub>2</sub> O              | 99        | 90.1                  | 654.8                                                     | 4         |
| 5     | Pd/Al <sub>2</sub> O <sub>3</sub>      | 50            | 0.5        | 25    | 1     | 0.1(Air)                      | H <sub>2</sub> O+THF          | 91        | 45.0                  | 450.9                                                     | 5         |
| 6     | Pt -CoO <sub>x</sub> -TiO <sub>2</sub> | 50            | 2          | 300   | 6     | 2.5                           | THF                           | 99        | 99                    | 719.5                                                     | 6         |
| 7     | Pd/C                                   | 20            | 1          | 120   | 1     | 6.2                           | Acetonitrile                  | 19        | 51                    | 533.5                                                     | 7         |
| 8     | NPS-Mo                                 | 10            | 0.1        | 300   | 1     | 0.13(20 mL/min)               | H <sub>2</sub> O+1,3-dioxolan | 90.7      | 97.6                  | 974.7                                                     | This work |

1. S. Li, J. Du, B. Zhang, Y. Liu, Q. Mei, Q. Meng, M. Dong, J. Du, Z. Zhao, L. Zheng, B. Han, M. Zhao and H. Liu, *Acta Physico Chimica Sinica*, 2022, 0, 2206019-2206010.
2. J. Zhang, Z. Wang, M. Chen, Y. Zhu, Y. Liu, H. He, Y. Cao and X. Bao, *Chinese Journal of Catalysis*, 2022, 43, 2212-2222.
3. B. Amin, J. Aubrecht, O. Kikhtyanin, E. Grechman, G. A. S. Alves, A. Tampieri, K. Föttinger, M. Jędrzejczyk, A. M. Ruppert, F. Ruiz-Zepeda and D. Kubička, *ACS Sustainable Chemistry & Engineering*, 2025, 13, 11652-11667.
4. Q. Deng, J. Lu, G. Sheng, Y.-C. Zhang, J. Wang, Z. Zeng, T. Yoskamtorn and S. C. Edman Tsang, *ACS Catalysis*, 2023, 13, 14356-14366.
5. S. Nishimura, T. Shimura and K. Ebitani, *Journal of the Taiwan Institute of Chemical Engineers*, 2017, 79, 97-102.
6. X. Liang, Z. Huang, X. Luo, X. Yang, D. Dang, X. Li and H. Peng, *Green Chemistry*, 2025, 27, 11133-11143.
7. M. Chidambaram and A. T. Bell, *Green Chemistry*, 2010, 12.
